# Supplementary material for: SnO2 nanoparticles anchored on carbon foam as a freestanding anode for high performance potassium-ion batteries
Source: Royal Society of Chemistry journal article supplement (doi:10.1039/c9ee03682b), 2020-01-01
Supplement: c9ee03682b1.pdf [file c9ee03682b1.pdf]

**SnO<sub>2</sub> Nanoparticles Anchored on Carbon Foam as Freestanding Anode for High  
Performance Potassium-Ion Batteries**

*Hailong Qiu, Lina Zhao, Xiaoxiao Huang, Muhammad Asif, Tianyu Tang, Wei Li,  
Teng Zhang, Tong Shen, Yanglong Hou\**

Beijing Key Laboratory for Magnetoelectric Materials and Devices (BKLMMD),  
Beijing Innovation Center for Engineering Science and Advanced Technology (BIC-  
ESAT),  
Department of Materials Science and Engineering, College of Engineering, Peking  
University, Beijing 100871, China

**Corresponding Author**

\* Email: hou@pku.edu.cn

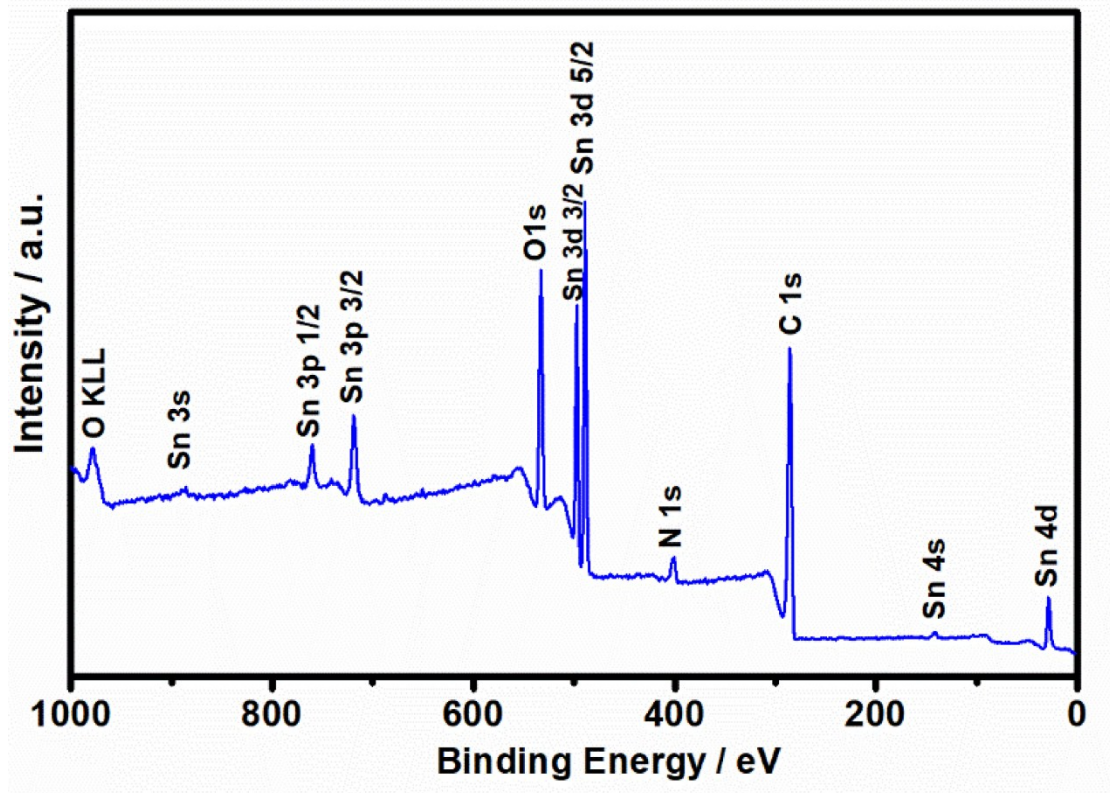

Figure S1. XPS survey spectra of SnO<sub>2</sub>@CF.

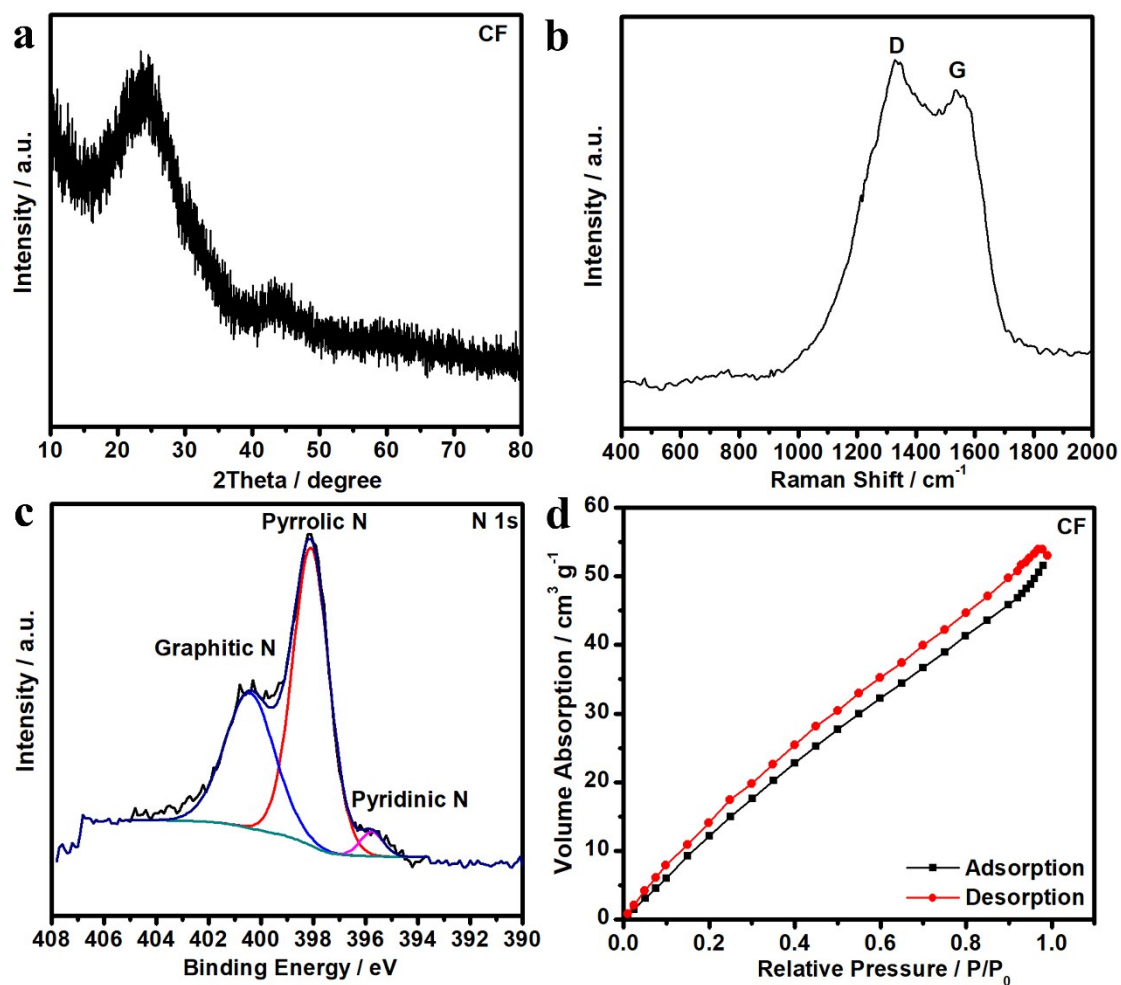

Figure S2. (a) XRD patterns and (b) Raman spectra of SnO<sub>2</sub>@CF. The high-resolution (c) N 1s XPS spectra and (d) N<sub>2</sub> adsorption and desorption isotherms of CF.

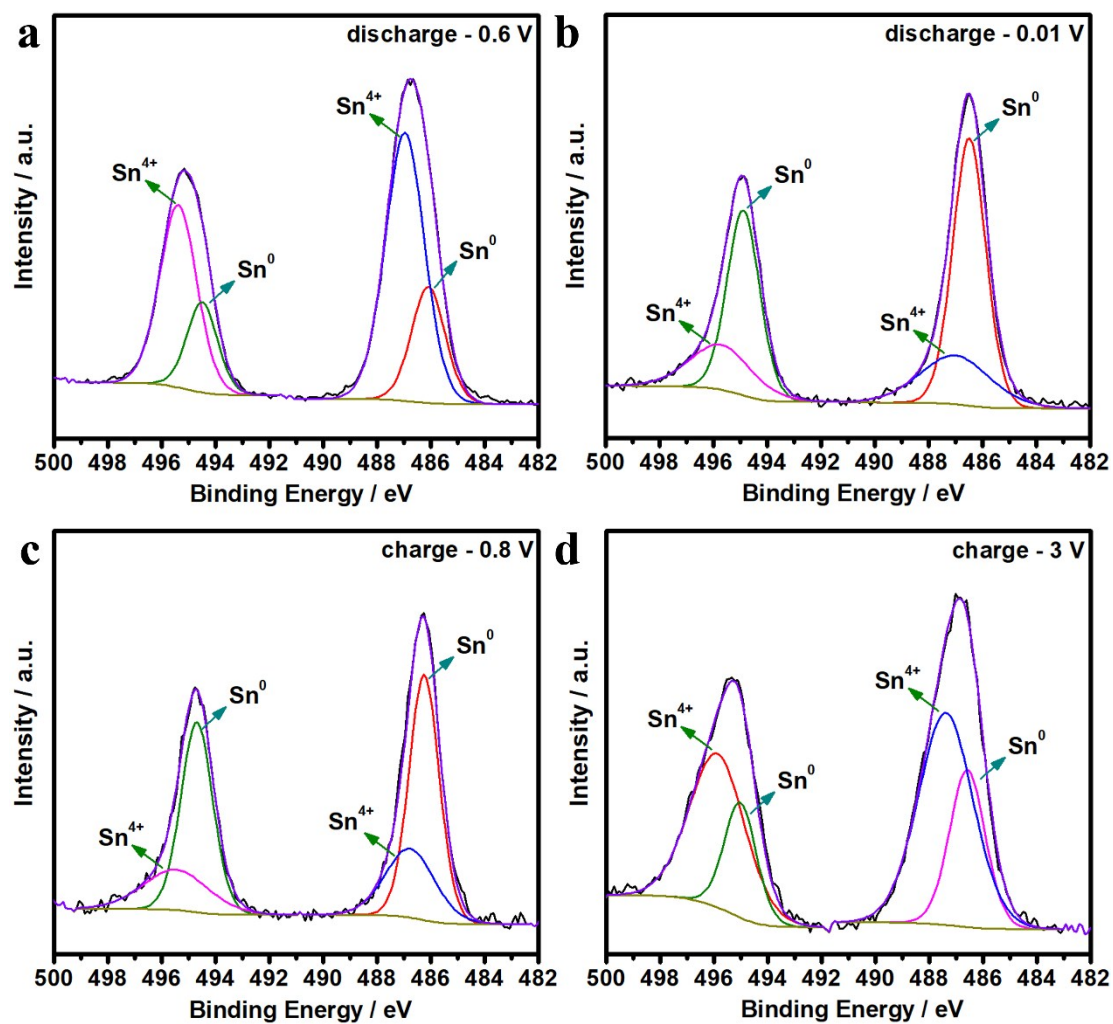

**Figure S3. Ex-situ XPS of SnO<sub>2</sub>@CF for K storage at different charge/discharge states in the first cycle, Sn 3d: (a) discharge to 0.6 V, (b) discharge to 0.01 V, (c) charge to 0.8 V and (d) charge to 3 V.**

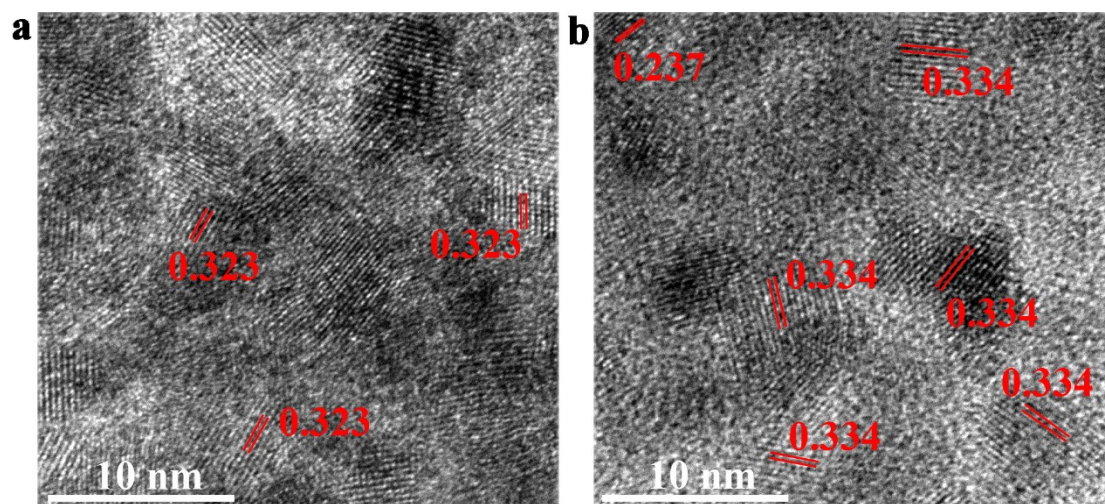

**Figure S4.** HRTEM images of SnO<sub>2</sub>@CF electrode materials observed (a) at fully discharged and (b) at fully charged states.

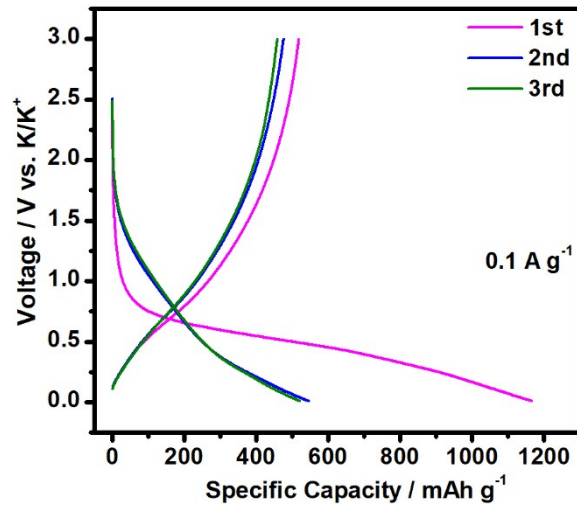

Figure S5. Galvanostatic charge and discharge curves at  $0.1 \text{ A g}^{-1}$  for the initial three cycles.

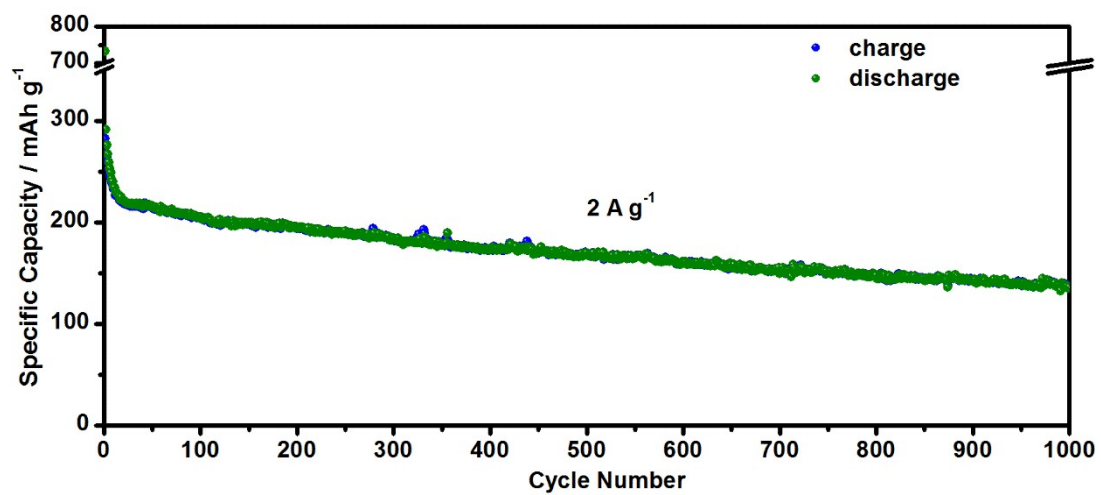

Figure S6. Cycle stability of SnO<sub>2</sub>@CF for K ions storage at 2 A g<sup>-1</sup>.

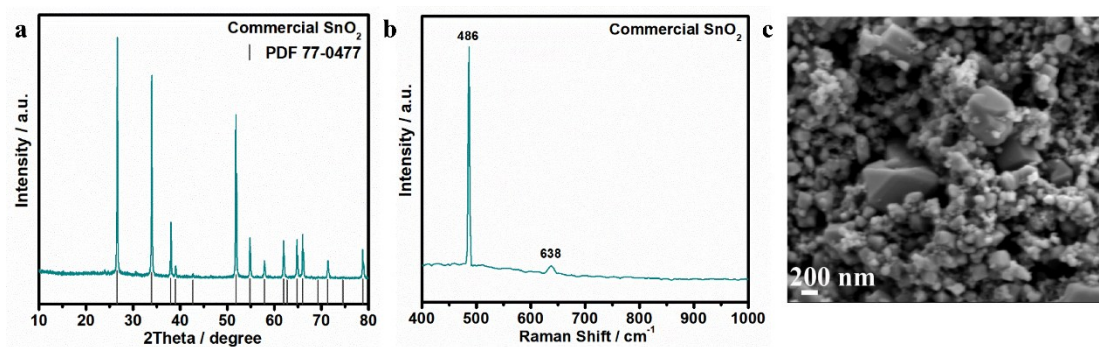

**Figure S7. (a) XRD patterns, (b) Raman spectra and (c) SEM image of commercial SnO<sub>2</sub>.**



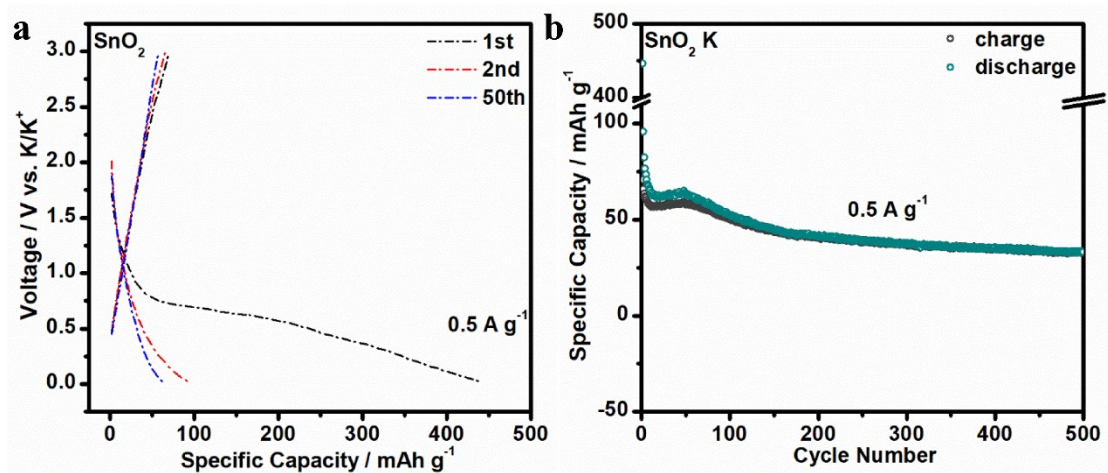

Figure S8. Electrochemical performances of SnO<sub>2</sub>, (a) Galvanostatic charge and discharge curves and (b) cycle stability at 0.5 A g<sup>-1</sup> for K ions storage.

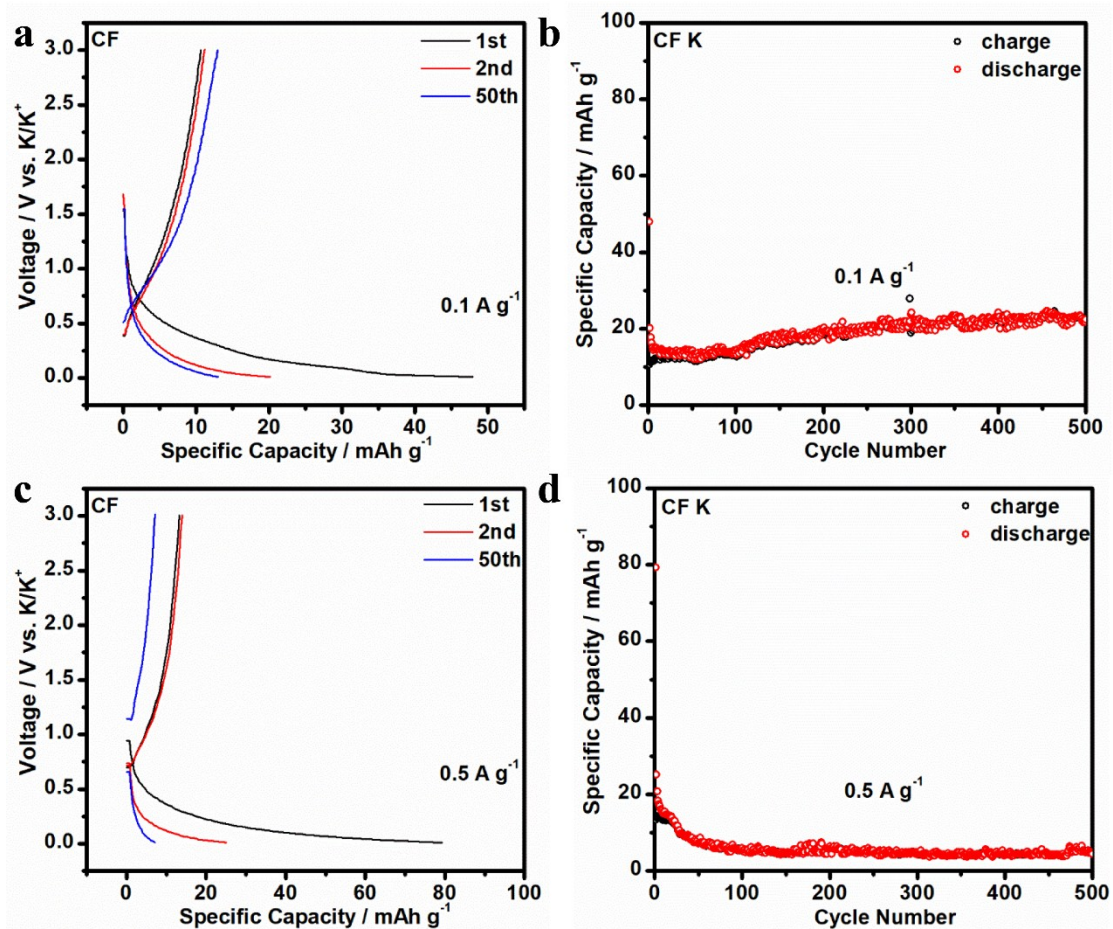

Figure S9. Electrochemical performances of CF for K ions storage, (a) Galvanostatic charge and discharge curves and (b) cycle stability at  $0.1 \text{ A g}^{-1}$ . (c) Galvanostatic charge and discharge curves and (d) Cycle stability at  $0.5 \text{ A g}^{-1}$ .

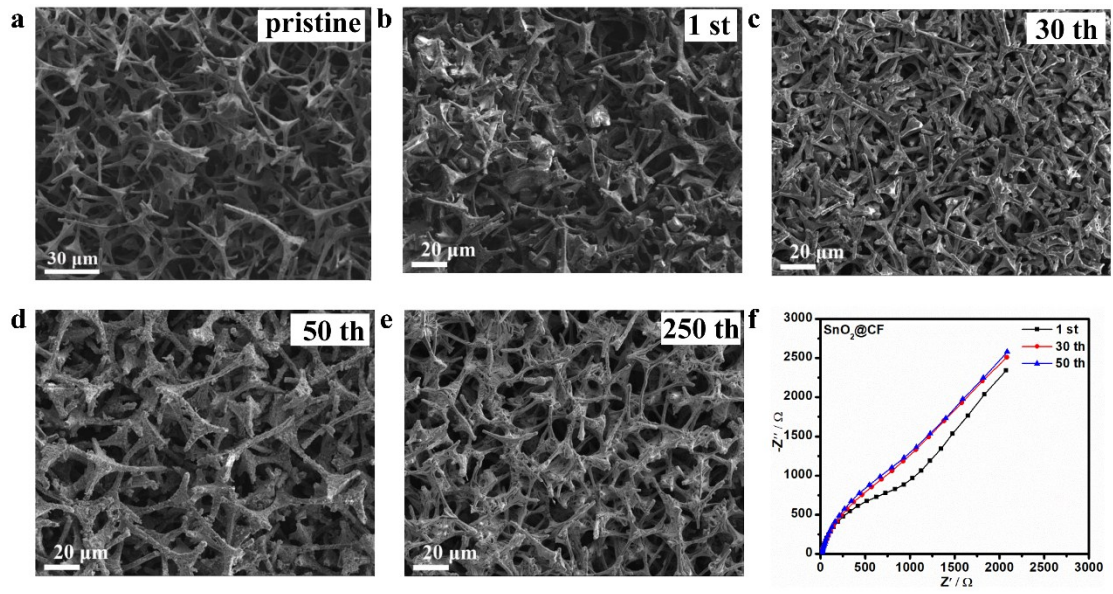

**Figure S10.** (a-e) SEM images of SnO<sub>2</sub>@CF after different cycles for K ions storage. (f) Nyquist plots of SnO<sub>2</sub>@CF after different cycles.

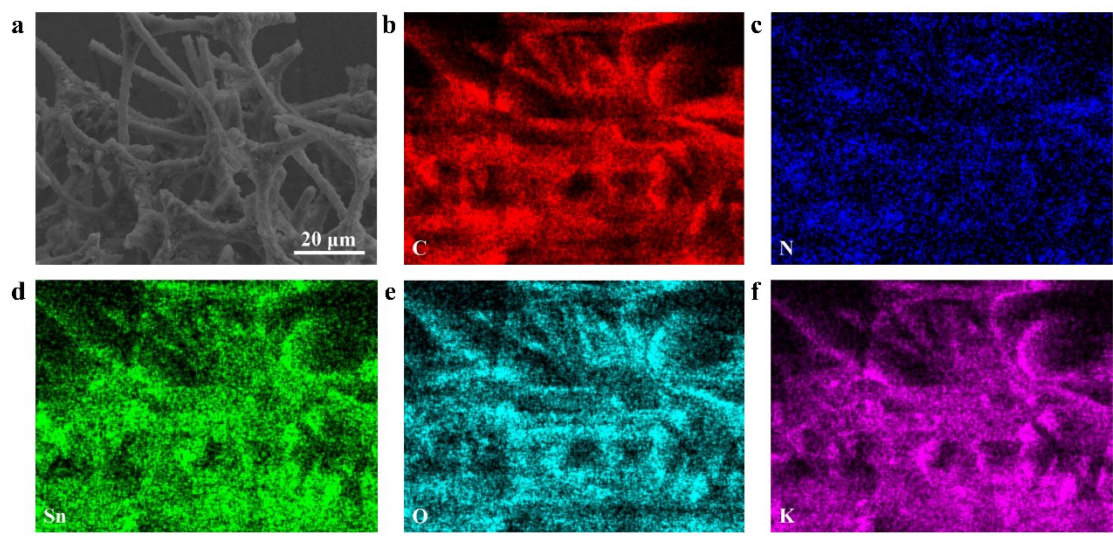

**Figure S11. (a) SEM image of the SnO<sub>2</sub>@CF electrode after cycling. (b) C, (c) N, (d) Sn, (e) O and (f) k elemental mapping of the SnO<sub>2</sub>@CF electrode after cycling.**

**Table S1. Comparison of electrochemical performance of the SnO<sub>2</sub>@CF anode with the previously reported SnO<sub>2</sub> based PIBs anodes.**

| Material                  | Capacity-<br>Current density                       | Cycle performance                                                    | Energy<br>density                                   | Reference |
|---------------------------|----------------------------------------------------|----------------------------------------------------------------------|-----------------------------------------------------|-----------|
| SnO <sub>2</sub> @CF      | 564.2 mAh g <sup>-1</sup> at 0.1 A g <sup>-1</sup> | 398.8 mAh g <sup>-1</sup> at 0.1 A g <sup>-1</sup> after 150 cycles  | 227.1 Wh kg <sup>-1</sup> (0.1 A g <sup>-1</sup> )  | this work |
|                           | 440.0 mAh g <sup>-1</sup> at 0.2 A g <sup>-1</sup> |                                                                      |                                                     |           |
|                           | 371.4 mAh g <sup>-1</sup> at 0.5 A g <sup>-1</sup> |                                                                      |                                                     |           |
|                           | 307.6 mAh g <sup>-1</sup> at 1 A g <sup>-1</sup>   |                                                                      |                                                     |           |
|                           | 247.3 mAh g <sup>-1</sup> at 2 A g <sup>-1</sup>   |                                                                      |                                                     |           |
|                           | 143.5 mAh g <sup>-1</sup> at 5 A g <sup>-1</sup>   |                                                                      |                                                     |           |
| P-SGC                     | 287.0 mAh g <sup>-1</sup> at 0.2 A g <sup>-1</sup> | 285.9 mAh g <sup>-1</sup> at 0.1 A g <sup>-1</sup> after 60 cycles   | ~253.2 Wh kg <sup>-1</sup> (0.1 A g <sup>-1</sup> ) | 1         |
|                           | 237.3 mAh g <sup>-1</sup> at 0.5 A g <sup>-1</sup> |                                                                      |                                                     |           |
|                           | 208.5 mAh g <sup>-1</sup> at 1 A g <sup>-1</sup>   |                                                                      |                                                     |           |
| SnO <sub>2</sub> @G<br>@C | 270.1 mAh g <sup>-1</sup> at 0.1 A g <sup>-1</sup> | 202.06 mAh g <sup>-1</sup> at 0.1 A g <sup>-1</sup> after 100 cycles | ~135.6 Wh kg <sup>-1</sup> (0.1 A g <sup>-1</sup> ) | 2         |
|                           | 219.9 mAh g <sup>-1</sup> at 0.2 A g <sup>-1</sup> |                                                                      |                                                     |           |
|                           | 159.2 mAh g <sup>-1</sup> at 0.5 A g <sup>-1</sup> |                                                                      |                                                     |           |
|                           | 114.8 mAh g <sup>-1</sup> at 1 A g <sup>-1</sup>   |                                                                      |                                                     |           |
| SnO                       | 229 mAh g <sup>-1</sup> at 5 mA g <sup>-1</sup>    | 183 mAh g <sup>-1</sup> at 25 mA g <sup>-1</sup> after 30 cycles     | ~75.3 Wh kg <sup>-1</sup> 25 mA g <sup>-1</sup>     | 3         |
| G@C@S                     | 179 mAh g <sup>-1</sup> at 0.1 A g <sup>-1</sup>   | 147.8 mAh g <sup>-1</sup> at                                         | ~153.7                                              | 4         |

|                           |                                                   |                                                                    |                                                        |
|---------------------------|---------------------------------------------------|--------------------------------------------------------------------|--------------------------------------------------------|
| nO <sub>2</sub>           | 150 mAh g <sup>-1</sup> at 0.2 A g <sup>-1</sup>  | 0.05 A g <sup>-1</sup> after 85 cycles                             | Wh kg <sup>-1</sup><br>(0.1 A g <sup>-1</sup> )        |
|                           | 129 mAh g <sup>-1</sup> at 0.3 A g <sup>-1</sup>  |                                                                    |                                                        |
|                           | 119 mAh g <sup>-1</sup> at 0.4 A g <sup>-1</sup>  |                                                                    |                                                        |
| SnO <sub>2</sub> @SS<br>M | 472 mAh g <sup>-1</sup> at 0.05 A g <sup>-1</sup> | 351 mAh g <sup>-1</sup> at 0.05 A g <sup>-1</sup> after 100 cycles | ~188.2 Wh kg <sup>-1</sup><br>(0.1 A g <sup>-1</sup> ) |
|                           | 361 mAh g <sup>-1</sup> at 0.1 A g <sup>-1</sup>  |                                                                    |                                                        |
|                           | 292 mAh g <sup>-1</sup> at 0.2 A g <sup>-1</sup>  |                                                                    |                                                        |
|                           | 195 mAh g <sup>-1</sup> at 0.5 A g <sup>-1</sup>  |                                                                    |                                                        |
|                           | 125 mAh g <sup>-1</sup> at 1 A g <sup>-1</sup>    |                                                                    |                                                        |

5

**Notes:**

**The energy density is calculated based solely on the mass of the active materials.**

**P-SGC:** phosphoric acid doped SnO<sub>2</sub>-graphene-carbon nanofibers

**SnO<sub>2</sub>@G@C:** SnO<sub>2</sub>-graphene-carbon nanofiber

**G@C@SnO<sub>2</sub>:** Dual Carbon-Confined SnO<sub>2</sub> Hollow Nanospheres

**SnO<sub>2</sub>@SSM:** SnO<sub>2</sub> nanosheets grown on stainless steel mesh

**Table S2. Comparison of electrochemical performance of the SnO<sub>2</sub>@CF anode with the other state-of-the-art PIBs anodes.**

| Material                    | Capacity-<br>Current density                        | Cycle performance                                                                                                                            | Reference |
|-----------------------------|-----------------------------------------------------|----------------------------------------------------------------------------------------------------------------------------------------------|-----------|
| SnO <sub>2</sub> @CF        | 564.2 mAh g <sup>-1</sup> at 0.1 A g <sup>-1</sup>  | 398.8 mAh g <sup>-1</sup> at 0.1 A                                                                                                           | this work |
|                             | 440.0 mAh g <sup>-1</sup> at 0.2 A g <sup>-1</sup>  | g <sup>-1</sup> after 150 cycles                                                                                                             |           |
|                             | 371.4 mAh g <sup>-1</sup> at 0.5 A g <sup>-1</sup>  | 231.7 mAh g <sup>-1</sup> at 1 A g <sup>-1</sup>                                                                                             |           |
|                             | 307.6 mAh g <sup>-1</sup> at 1 A g <sup>-1</sup>    | after 400 cycles                                                                                                                             |           |
|                             | 247.3 mAh g <sup>-1</sup> at 2 A g <sup>-1</sup>    | 136.1 mAh g <sup>-1</sup> at 2 A g <sup>-1</sup>                                                                                             |           |
|                             | 143.5 mAh g <sup>-1</sup> at 5 A g <sup>-1</sup>    | after 1000 cycles                                                                                                                            |           |
| SnP <sub>0.94</sub> @GO     | 309 mAh g <sup>-1</sup> at 0.025 A g <sup>-1</sup>  | 162 mAh g <sup>-1</sup> at 0.1 A g <sup>-1</sup><br>after 50 cycles                                                                          | 6         |
|                             | 84 mAh g <sup>-1</sup> at 0.5 A g <sup>-1</sup>     |                                                                                                                                              |           |
|                             | 57 mAh g <sup>-1</sup> at 1 A g <sup>-1</sup>       |                                                                                                                                              |           |
| SnS <sub>2</sub> @C@rG<br>O | 721.9 mAh g <sup>-1</sup> at 0.05 A g <sup>-1</sup> | 298.1 mAh g <sup>-1</sup> at 0.5 A<br>g <sup>-1</sup> after 500 cycles                                                                       | 7         |
|                             | 397.4 mAh g <sup>-1</sup> at 2 A g <sup>-1</sup>    |                                                                                                                                              |           |
| ZnSC@C@R<br>GO              | 419 mAh g <sup>-1</sup> at 0.02 A g <sup>-1</sup>   | 254 mAh g <sup>-1</sup> at 0.1 A g <sup>-1</sup><br>after 100 cycles<br>208 mAh g <sup>-1</sup> at 0.5 A g <sup>-1</sup><br>after 300 cycles | 8         |
|                             | 362 mAh g <sup>-1</sup> at 0.05 A g <sup>-1</sup>   |                                                                                                                                              |           |
|                             | 295 mAh g <sup>-1</sup> at 0.1 A g <sup>-1</sup>    |                                                                                                                                              |           |
|                             | 223 mAh g <sup>-1</sup> at 0.2 A g <sup>-1</sup>    |                                                                                                                                              |           |
|                             | 162 mAh g <sup>-1</sup> at 0.5 A g <sup>-1</sup>    |                                                                                                                                              |           |

|                                     |                                                    |                                                                     |    |
|-------------------------------------|----------------------------------------------------|---------------------------------------------------------------------|----|
|                                     | 406 mAh g <sup>-1</sup> at 0.1 A g <sup>-1</sup>   |                                                                     |    |
| FeS <sub>2</sub> @G@C               | 332 mAh g <sup>-1</sup> at 0.2 A g <sup>-1</sup>   | 120 mAh g <sup>-1</sup> at 1 A g <sup>-1</sup>                      | 9  |
| NF                                  | 243 mAh g <sup>-1</sup> at 0.5 A g <sup>-1</sup>   | after 680 cycles                                                    |    |
|                                     | 171 mAh g <sup>-1</sup> at 1 A g <sup>-1</sup>     |                                                                     |    |
|                                     | 486.7 mAh g <sup>-1</sup> at 0.1 A g <sup>-1</sup> |                                                                     |    |
| CoS@C                               | 381.9 mAh g <sup>-1</sup> at 0.2 A g <sup>-1</sup> | 401.2 mAh g <sup>-1</sup> at 0.1 A g <sup>-1</sup> after 100 cycles | 10 |
|                                     | 306.7 mAh g <sup>-1</sup> at 0.4 A g <sup>-1</sup> |                                                                     |    |
|                                     | 244.8 mAh g <sup>-1</sup> at 0.8 A g <sup>-1</sup> |                                                                     |    |
|                                     | 201.6 mAh g <sup>-1</sup> at 1.6 A g <sup>-1</sup> |                                                                     |    |
|                                     | 258 mAh g <sup>-1</sup> at 0.1 A g <sup>-1</sup>   |                                                                     |    |
| MoS <sub>2</sub> @NC                | 238 mAh g <sup>-1</sup> at 0.2 A g <sup>-1</sup>   | 212 mAh g <sup>-1</sup> at 0.1 A g <sup>-1</sup>                    | 11 |
|                                     | 204 mAh g <sup>-1</sup> at 0.5 A g <sup>-1</sup>   | after 100 cycles                                                    |    |
|                                     | 171 mAh g <sup>-1</sup> at 1 A g <sup>-1</sup>     |                                                                     |    |
|                                     | 420 mAh g <sup>-1</sup> at 0.1 A g <sup>-1</sup>   |                                                                     |    |
| TiNb <sub>2</sub> O <sub>6</sub> @M | 373 mAh g <sup>-1</sup> at 0.2 A g <sup>-1</sup>   | 174 mAh g <sup>-1</sup> at 1 A g <sup>-1</sup>                      | 12 |
| oS <sub>2</sub> @C                  | 309 mAh g <sup>-1</sup> at 0.5 A g <sup>-1</sup>   | after 300 cycles                                                    |    |
|                                     | 233 mAh g <sup>-1</sup> at 1 A g <sup>-1</sup>     |                                                                     |    |
|                                     | 350 mAh g <sup>-1</sup> at 0.1 A g <sup>-1</sup>   | 355 mAh g <sup>-1</sup> at 0.2 A g <sup>-1</sup>                    |    |
| MoSe <sub>2</sub> @MXe              | 324 mAh g <sup>-1</sup> at 0.2 A g <sup>-1</sup>   | after 100 cycles                                                    | 13 |
| ne@C                                | 294 mAh g <sup>-1</sup> at 0.5 A g <sup>-1</sup>   | 317 mAh g <sup>-1</sup> at 1 A g <sup>-1</sup>                      |    |
|                                     | 270 mAh g <sup>-1</sup> at 1 A g <sup>-1</sup>     | after 300 cycles                                                    |    |
|                                     |                                                    |                                                                     |    |
|                                     | 374 mAh g <sup>-1</sup> at 0.1 A g <sup>-1</sup>   |                                                                     |    |
| VSe <sub>2</sub>                    | 350 mAh g <sup>-1</sup> at 0.2 A g <sup>-1</sup>   | 335 mAh g <sup>-1</sup> at 0.2 A g <sup>-1</sup>                    | 14 |
|                                     | 334 mAh g <sup>-1</sup> at 0.5 A g <sup>-1</sup>   | after 200 cycles                                                    |    |
|                                     | 269 mAh g <sup>-1</sup> at 1 A g <sup>-1</sup>     |                                                                     |    |
|                                     | 254 mAh g <sup>-1</sup> at 0.1 A g <sup>-1</sup>   | 230 mAh g <sup>-1</sup> at 0.2 A g <sup>-1</sup>                    | 15 |
| ReSe <sub>2</sub> @G@CNFs           | 157 mAh g <sup>-1</sup> at 2 A g <sup>-1</sup>     | after 200 cycles                                                    |    |
|                                     | 261mAh g <sup>-1</sup> at 0.1 A g <sup>-1</sup>    | 228 mAh g <sup>-1</sup> at 0.1 A g <sup>-1</sup>                    | 16 |
| VN@QDS@                             |                                                    |                                                                     |    |



|                                       |                                                     |                                                     |    |
|---------------------------------------|-----------------------------------------------------|-----------------------------------------------------|----|
| CM                                    | 215 mAh g <sup>-1</sup> at 0.5 A g <sup>-1</sup>    | after 100 cycles                                    | 17 |
|                                       | 187 mAh g <sup>-1</sup> at 1 A g <sup>-1</sup>      | 215 mAh g <sup>-1</sup> at 0.5 A g <sup>-1</sup>    |    |
|                                       | 152 mAh g <sup>-1</sup> at 2 A g <sup>-1</sup>      | after 500 cycles                                    |    |
| V <sub>2</sub> O <sub>3</sub> @PNCN   | 240 mAh g <sup>-1</sup> at 0.05 A g <sup>-1</sup>   | ~215 mAh g <sup>-1</sup> at 0.05 A g <sup>-1</sup>  | 17 |
| Fs                                    | 134 mAh g <sup>-1</sup> at 1 A g <sup>-1</sup>      | g <sup>-1</sup> after 500 cycles                    |    |
| TiO <sub>2</sub> @C                   | 208.5 mAh g <sup>-1</sup> at 0.2 A g <sup>-1</sup>  |                                                     | 18 |
|                                       | 180.1 mAh g <sup>-1</sup> at 0.4 A g <sup>-1</sup>  | 132.8 mAh g <sup>-1</sup> at 0.5 A g <sup>-1</sup>  |    |
|                                       | 114.6 mAh g <sup>-1</sup> at 1 A g <sup>-1</sup>    | g <sup>-1</sup> after 1200 cycles                   |    |
|                                       | 97.3 mAh g <sup>-1</sup> at 2 A g <sup>-1</sup>     |                                                     |    |
| MoO <sub>2</sub> @rGO                 | 281.8 mAh g <sup>-1</sup> at 0.05 A g <sup>-1</sup> | 218.9 mAh g <sup>-1</sup> at 0.05 A g <sup>-1</sup> | 19 |
|                                       | 240.3 mAh g <sup>-1</sup> at 0.1 A g <sup>-1</sup>  | g <sup>-1</sup> after 200 cycles                    |    |
|                                       | 214.1 mAh g <sup>-1</sup> at 0.2 A g <sup>-1</sup>  | 104.2 mAh g <sup>-1</sup> at 0.5 A g <sup>-1</sup>  |    |
|                                       | 176.4 mAh g <sup>-1</sup> at 0.5 A g <sup>-1</sup>  | g <sup>-1</sup> after 500 cycles                    |    |
| Nb <sub>2</sub> O <sub>5-x</sub> @rGO | 111 mAh g <sup>-1</sup> at 1 A g <sup>-1</sup>      | 81 mAh g <sup>-1</sup> at 1.5 A g <sup>-1</sup>     | 20 |
|                                       | O                                                   | after 3500 cycles                                   |    |
| FeP@CNBs                              | 201 mAh g <sup>-1</sup> at 0.1 A g <sup>-1</sup>    |                                                     | 21 |
|                                       | 156 mAh g <sup>-1</sup> at 0.2 A g <sup>-1</sup>    | 205 mAh g <sup>-1</sup> at 0.1 A g <sup>-1</sup>    |    |
|                                       | 101 mAh g <sup>-1</sup> at 0.5 A g <sup>-1</sup>    | after 300 cycles                                    |    |
|                                       | 65 mAh g <sup>-1</sup> at 1 A g <sup>-1</sup>       |                                                     |    |
| P@N-<br>PHCNFs                        | 745 mAh g <sup>-1</sup> at 0.1 A g <sup>-1</sup>    |                                                     | 22 |
|                                       | 689 mAh g <sup>-1</sup> at 0.3 A g <sup>-1</sup>    | 465 mAh g <sup>-1</sup> at 2 A g <sup>-1</sup>      |    |
|                                       | 651 mAh g <sup>-1</sup> at 0.5 A g <sup>-1</sup>    | after 800 cycles                                    |    |
|                                       | 613 mAh g <sup>-1</sup> at 1 A g <sup>-1</sup>      |                                                     |    |
| Bi                                    | 398.4 mAh g <sup>-1</sup> at 0.02 A g <sup>-1</sup> | 322.7 mAh g <sup>-1</sup> at 0.8 A g <sup>-1</sup>  | 23 |
|                                       |                                                     | g <sup>-1</sup> after 300 cycles                    |    |

|          |                                                                                                                                                                                                                                                                                 |                                                                                                                                                  |    |
|----------|---------------------------------------------------------------------------------------------------------------------------------------------------------------------------------------------------------------------------------------------------------------------------------|--------------------------------------------------------------------------------------------------------------------------------------------------|----|
| MXene@Sb | 503.84 mAh g <sup>-1</sup> at 0.1 A g <sup>-1</sup><br>459.98 mAh g <sup>-1</sup> at 0.2 A g <sup>-1</sup><br>393.58 mAh g <sup>-1</sup> at 0.3 A g <sup>-1</sup><br>335.54 mAh g <sup>-1</sup> at 0.4 A g <sup>-1</sup><br>270.81 mAh g <sup>-1</sup> at 0.5 A g <sup>-1</sup> | 270 mAh g <sup>-1</sup> at 0.5 A g <sup>-1</sup><br>after 500 cycles                                                                             | 24 |
| np-Ge    | 290 mAh g <sup>-1</sup> at 0.02 A g <sup>-1</sup>                                                                                                                                                                                                                               | 120 mAh g <sup>-1</sup> at 0.02 A g <sup>-1</sup><br>after 400 cycles                                                                            | 25 |
| NCNF     | 238 mAh g <sup>-1</sup> at 0.1 A g <sup>-1</sup><br>217 mAh g <sup>-1</sup> at 0.3 A g <sup>-1</sup><br>192 mAh g <sup>-1</sup> at 0.5 A g <sup>-1</sup><br>172 mAh g <sup>-1</sup> at 1 A g <sup>-1</sup>                                                                      | 205 mAh g <sup>-1</sup> at 0.5 A g <sup>-1</sup><br>after 1000 cycles<br>164 mAh g <sup>-1</sup> at 1 A g <sup>-1</sup><br>after 2000 cycles     | 26 |
| NHC      | 266.1 mAh g <sup>-1</sup> at 0.1 A g <sup>-1</sup><br>260.9 mAh g <sup>-1</sup> at 0.2 A g <sup>-1</sup><br>242.6 mAh g <sup>-1</sup> at 0.5 A g <sup>-1</sup><br>224.3 mAh g <sup>-1</sup> at 1 A g <sup>-1</sup>                                                              | 161.3 mAh g <sup>-1</sup> at 1 A g <sup>-1</sup><br>after 1600 cycles                                                                            | 27 |
| SHCS     | 202 mAh g <sup>-1</sup> at 1.5 A g <sup>-1</sup><br>160 mAh g <sup>-1</sup> at 3 A g <sup>-1</sup><br>110 mAh g <sup>-1</sup> at 5 A g <sup>-1</sup>                                                                                                                            | ~284 mAh g <sup>-1</sup> at 0.2 A g <sup>-1</sup><br>after 1000 cycles                                                                           | 28 |
| SOPCMs   | 230 mAh g <sup>-1</sup> at 0.05 A g <sup>-1</sup><br>213 mAh g <sup>-1</sup> at 0.2 A g <sup>-1</sup><br>176 mAh g <sup>-1</sup> at 0.5 A g <sup>-1</sup><br>158 mAh g <sup>-1</sup> at 1 A g <sup>-1</sup>                                                                     | 226.6 mAh g <sup>-1</sup> at 0.05 A g <sup>-1</sup><br>after 100 cycles<br>108.4 mAh g <sup>-1</sup> at 1 A g <sup>-1</sup><br>after 2000 cycles | 29 |
| ADAPTS   | 66 mAh g <sup>-1</sup> at 1.55 A g <sup>-1</sup>                                                                                                                                                                                                                                | 70 mAh g <sup>-1</sup> at 0.155 A g <sup>-1</sup><br>after 1000 cycles                                                                           | 30 |

**Notes:**

**ZnSC@C@RGO:** carbon-encapsulated ZnS subunits nanosphere@carbon nanosphere@ reduced graphene oxide networks

**FeS<sub>2</sub>@G@CNF**: FeS<sub>2</sub>@graphene@carbon nanofibers

**CoS@C**: 3D amorphous carbon-encapsulated CoS@nitrogen-doped carbon nanofiber nanotube/CoS-coated carbon nanofiber (AC@CoS/NCNTs/CoS@CNFs) network

**MoS<sub>2</sub>@NC**: MoS<sub>2</sub>@N-doped-C

**TiNb<sub>2</sub>O<sub>6</sub>@MoS<sub>2</sub>@C**: porous metallic TiNb<sub>2</sub>O<sub>6</sub> as the core and carbon encapsulated MoS<sub>2</sub> nanosheets as the shell

**ReSe<sub>2</sub>@G@CNFs**: ReSe<sub>2</sub>-carbon nanofiber

**VN-QDS@CM**: VN quantum dots encapsulated in ultralarge pillared N-doped mesoporous carbon microspheres

**V<sub>2</sub>O<sub>3</sub>@PNCNFs**: V<sub>2</sub>O<sub>3</sub> nanoparticles embedded in porous N-doped carbon nanofiber

**FeP@CNBs**: yolk-shell FeP@C nanoboxes

**P@N-PHCNFs**: P @free-standing nitrogen-doped porous hollow carbon nanofiber

**np-Ge**: Nanoporous Ge

**NCNF**: N-doped carbon nanofibers

**SHCS**: sulfur-grafted hollow carbon spheres

**SOPCMs**: sulfur and oxygen codoped porous hard carbon microspheres

**ADAPTS**: azobenzene-4,4'-dicarboxylic acid potassium salts

## References

1. Z. Huang, Z. Chen, S. Ding, C. Chen and M. Zhang, *Nanotechnology*, 2018, **29**, 375702.
2. Z. Huang, Z. Chen, S. Ding, C. Chen and M. Zhang, *Materials Letters*, 2018, **219**, 19-22.
3. M. Shimizu, R. Yatsuzuka, T. Koya, T. Yamakami and S. Arai, *ACS Applied Energy Materials*, 2018, **1**, 6865-6870.
4. Q. Wu, Q. Shao, Q. Li, Q. Duan, Y. Li and H. G. Wang, *ACS applied materials & interfaces*, 2018, **10**, 15642-15651.
5. G. Suo, D. Li, L. Feng, X. Hou, Y. Yang and W. Wang, *Journal of Electroanalytical Chemistry*, 2019, **833**, 113-118.

6. X. Zhao, W. Wang, Z. Hou, G. Wei, Y. Yu, J. Zhang and Z. Quan, *Chem Eng J*, 2019, **370**, 677-683.
7. D. Li, Q. Sun, Y. Zhang, L. Chen, Z. Wang, Z. Liang, P. Si and L. Ci, *ChemSusChem*, 2019, **12**, 1-13.
8. J. Chu, W. A. Wang, J. Feng, C. Y. Lao, K. Xi, L. Xing, K. Han, Q. Li, L. Song, P. Li, X. Li and Y. Bao, *Acs Nano*, 2019, DOI: 10.1021/acsnano.9b01773.
9. C. Chen, Y. Yang, X. Tang, R. Qiu, S. Wang, G. Cao and M. Zhang, *Small*, 2019, **15**, e1804740.
10. W. Miao, Y. Zhang, H. Li, Z. Zhang, L. Li, Z. Yu and W. Zhang, *Journal of Materials Chemistry A*, 2019, **7**, 5504-5512.
11. B. Jia, Q. Yu, Y. Zhao, M. Qin, W. Wang, Z. Liu, C.-Y. Lao, Y. Liu, H. Wu, Z. Zhang and X. Qu, *Adv Funct Mater*, 2018, **28**, 1803409.
12. L. Xing, Q. Yu, B. Jiang, J. Chu, C.Y. Lao, M. Wang, K. Han, Z. Liu, Y. Bao and W. Wang, *Journal of Materials Chemistry A*, 2019, **7**, 5760-5768.
13. H. Huang, J. Cui, G. Liu, R. Bi and L. Zhang, *Acs Nano*, 2019, **13**, 3448-3456.
14. C. Yang, J. Feng, F. Lv, J. Zhou, C. Lin, K. Wang, Y. Zhang, Y. Yang, W. Wang, J. Li and S. Guo, *Adv Mater*, 2018, **30**, e1800036.
15. Y. Liao, C. Chen, D. Yin, Y. Cai, R. He and M. Zhang, *Nano-Micro Letters*, 2019, **11**.
16. H. Wu, Q. Yu, C.Y. Lao, M. Qin, W. Wang, Z. Liu, C. Man, L. Wang, B. Jia and X. Qu, *Energy Storage Materials*, 2019, **18**, 43-50.
17. T. Jin, H. Li, Y. Li, L. Jiao and J. Chen, *Nano Energy*, 2018, **50**, 462-467.
18. Y. Li, C. Yang, F. Zheng, Q. Pan, Y. Liu, G. Wang, T. Liu, J. Hu and M. Liu, *Nano Energy*, 2019, **59**, 582-590.
19. C. Liu, S. Luo, H. Huang, Y. Zhai and Z. Wang, *ChemSusChem*, 2019, **12**, 873-880.
20. Z.Q Tong, R. Yang, S. Wu, D. Shen, T. Jiao, K. Zhang, W. Zhang and C. S. Lee, *Small*, 2019, 1901272.
21. F. Yang, H. Gao, J. Hao, S. Zhang, P. Li, Y. Liu, J. Chen and Z. Guo, *Adv*

- Funct Mater*, 2019, **29**, 1808291.
22. Y. Wu, S. Hu, R. Xu, J. Wang, Z. Peng, Q. Zhang and Y. Yu, *Nano letters*, 2019, **19**, 1351-1358.
  23. K. Lei, C. Wang, L. Liu, Y. Luo, C. Mu, F. Li and J. Chen, *Angewandte Chemie*, 2018, **57**, 4687-4691.
  24. Y. Tian, Y. An, S. Xiong, J. Feng and Y. Qian, *Journal of Materials Chemistry A*, 2019, **7**, 9716-9725.
  25. Q. Yang, Z. Wang, W. Xi and G. He, *Electrochemistry Communications*, 2019, **101**, 68-72.
  26. Y. Xu, C. Zhang, M. Zhou, Q. Fu, C. Zhao, M. Wu and Y. Lei, *Nat Commun*, 2018, **9**, 1720.
  27. W. Yang, J. Zhou, S. Wang, W. Zhang, Z. Wang, F. Lv, K. Wang, Q. Sun and S. Guo, *Energy & Environmental Science*, 2019, **12**, 1605-1612.
  28. J. Ding, H. Zhang, H. Zhou, J. Feng, X. Zheng, C. Zhong, E. Paek, W. Hu and D. Mitlin, *Adv Mater*, 2019, 1900429.
  29. M. Chen, W. Wang, X. Liang, S. Gong, J. Liu, Q. Wang, S. Guo and H. Yang, *Advanced Energy Materials*, 2018, **8**, 1800171.
  30. Y. Liang, C. Luo, F. Wang, S. Hou, S.C. Liou, T. Qing, Q. Li, J. Zheng, C. Cui and C. Wang, *Advanced Energy Materials*, 2019, **9**, 1802986.
